# Supplementary material
Source: PubMed Central journal article supplement (PMC3092815)
Supplement: NIHMS268988-supplement-Supp_Figure_S1.pdf [file NIHMS268988-supplement-Supp_Figure_S1.pdf]

SUPPLEMENTARY FIGURE 1 A structure-based sequence alignment of PepcA with Pepc from *E. coli* (Protein Data Bank entry 1jqn) and *Z. mays* (1jqo) was generated with Strap.[1] Representative archaeal PepcA sequences were subsequently added to the alignment. The *Sulfolobus acidocaldarius* PepcA is sensitive to inhibition by aspartate; the *Methanothermobacter thermautotrophicus* PepcA is not. The secondary structure derived from the X-ray coordinates is shown for *C. perfringens* PepcA above the alignment, and for *Z. mays* Pepc below the alignment. Residues missing from the electron density are shown in lighter colors (for example the residues involved in  $\text{HCO}_3^-$  binding are missing from all three X-ray structures, at positions corresponding to 349-353 in the *C. perfringens* sequence). The insertion beginning at *C. perfringens* residue 360 is present only in PepcA sequences from *C. perfringens*, *Methanopyrus kandleri*, *Methanosarcina mazei*, *Methanosarcina barkeri* and *Methanosarcina acetivorans*. In the line highlighting residues discussed in the text, active-site residues are red; allosteric-site residues are green. His11 and Arg246 (His138 and Arg587 in *E. coli* numbering) in orange are in the active-site of the R-state; in the *E. coli* T-state His138 and Arg587 are not positioned in the active-site (Arg587 forms part of the allosteric inhibitor-binding site). Lys340 in dark blue is the residue in the proposed aspartate-binding site of PepcA responsible for determining the sensitivity of members of the PepcA family to inhibition by aspartate. Arg344 and Arg390 in light blue are in the active-site and are also part of the proposed aspartate-binding site in PepcA.

## REFERENCES

1 Gille C, Frömmel C. STRAP: editor for STRuctural Alignments of Proteins. *Bioinformatics* 2001; **17**:377-8.

C. perfringens 1  
M. thermoautotrophicus 1  
S. acidocaldarius 1  
E. coli 1  
Z. mays 1 MNEQYSALRSNVSM LGKVLGETIKDALGEHILERVETIRKLSKSSR . AGNDANRQELLTTLQNLNDEL LPVAR  
Z. mays X-ray 1 MASTKAPGPGEKHHSIDAQLRQLVPGKVSEDDKLI EYDALLVDRFLNQLDLHGPSLREFVQECYEVSADYEGKGD TTKLGELGAKLTGLAPADAILVAS

Residues noted in text

C. perfringens X-ray

C. perfringens 1 MKIPCSMMTQHDPNVET.....  
M. thermoautotrophicus 1 MKVPRCMSTQHDPNVNP.....  
S. acidocaldarius 1 MRKIPRTMSTQHDPNAKV.....  
E. coli 74 AFSQFLNLANTAEQYHSISPKGEAASNP.....EVIARTLRKLNQPELSEDTIKKAVESLSLELVLTAHPTEITRRTLIHKMVEVNACLKQL  
Z. mays 101 SILHMLNLANLAEVQIAHRRRN SKLKKGGFADEGSATTESDIEETLKR LVSEV GKSPEEVFEALKNQTVDLVFTAHP TQSARRSLLQKNARIRNCLTQL

Residues noted in text

C. perfringens X-ray

C. perfringens 18 .....YISIQQEPAEAIKGLTPQDKGGLG.....IEEVM..IDFEGK.LTP  
M. thermoautotrophicus 18 .....PFFAEEP ELGGEDEIREAYYVFS.....HLGCDEQM..WDCEGKEVDN  
S. acidocaldarius 19 .....PEWNQGEAISGENEII EAYLAFS.....RYGVEVM..WDAEGKDVDT  
E. coli 162 DNKDIADYEHNQLMRRLRQLIAQSWHTDEIRKLRPSPVDEAKWGF AVVENS LWQGVPNYLRELNEQLEENLG.YKLPVEFV PVRFTSWMGGDRDGNPNVT  
Z. mays 201 NAKDITDDDKQELDEALQREIQAAFRTDEIRRAQPTPQAE MRYGMSYIHETVWKGVPKFLRRVDTALKNIGINERLPYNVSLIRFSSWMGGDRDGNPRVT

Residues noted in text

C. perfringens X-ray

C. perfringens 56 YHQTSQIALGLISN.....  
M. thermoautotrophicus 59 YVVKKLLTKYQAFFR.....  
S. acidocaldarius 60 HVVRKLLSQYPEFFR.....  
E. coli 261 ADITRHVLLSRWKATDLFLKDIQVLVSELSMVEATPELLALVGE.....EGAAEPYRYLMKNLRSRLMATQAWLEARLKGEELPK  
Z. mays 301 PEVTRDVCLLARMMAANLYIDQIEELMFELSMWRCNDEL RVRAEELHSSSGSKVTKYIEFWKQIPPNEPYRVILGHVRDKLYNTRERARHLLASGVSEI

Residues noted in text

C. perfringens X-ray

|                        |     |                                                     |       |       |       |       |
|------------------------|-----|-----------------------------------------------------|-------|-------|-------|-------|
| C. perfringens         | 70  | .....                                               | 70    | ..... | 80    | ..... |
| M. thermoautotrophicus | 74  | .....                                               | ..... | ..... | ..... | ..... |
| S. acidocaldarius      | 75  | .....                                               | ..... | ..... | ..... | ..... |
| E. coli                | 342 | P. EGLLTQNEELWEPLYACYQSLQACGMGIIANGDLLDTLRRVKCFGVPL | V     | R     | I     | D     |
| Z. mays                | 401 | SAESSFTSIEEFLEPLELCYKSLCDCGDKAIADGSLDLLLRQVFTFGLSL  | V     | K     | L     | D     |
| Z. mays X-ray          |     | .....                                               | ..... | ..... | ..... | ..... |

Residues noted in text

C. perfringens X-ray

|                        |     |           |       |       |       |       |       |       |       |       |       |       |       |       |       |       |       |       |       |
|------------------------|-----|-----------|-------|-------|-------|-------|-------|-------|-------|-------|-------|-------|-------|-------|-------|-------|-------|-------|-------|
| C. perfringens         | 90  | .....     | 90    | ..... | 100   | ..... | 110   | ..... | 120   | ..... | 130   | ..... | 140   | ..... | 150   | ..... | 160   | ..... |       |
| M. thermoautotrophicus | 99  | .....     | ..... | ..... | ..... | ..... | ..... | ..... | ..... | ..... | ..... | ..... | ..... | ..... | ..... | ..... | ..... | ..... |       |
| S. acidocaldarius      | 100 | .....     | ..... | ..... | ..... | ..... | ..... | ..... | ..... | ..... | ..... | ..... | ..... | ..... | ..... | ..... | ..... | ..... |       |
| E. coli                | 441 | LPRNWQPSA | E     | T     | R     | E     | V     | L     | D     | T     | C     | Q     | V     | I     | A     | E     | A     | P     | ..... |
| Z. mays                | 501 | LPPDLPQTD | E     | I     | A     | D     | V     | I     | G     | A     | F     | H     | V     | L     | A     | E     | L     | P     | ..... |
| Z. mays X-ray          |     | .....     | ..... | ..... | ..... | ..... | ..... | ..... | ..... | ..... | ..... | ..... | ..... | ..... | ..... | ..... | ..... | ..... |       |

Residues noted in text

C. perfringens X-ray

|                        |     |       |       |       |       |       |       |       |       |       |       |       |       |       |       |       |       |       |       |       |       |   |
|------------------------|-----|-------|-------|-------|-------|-------|-------|-------|-------|-------|-------|-------|-------|-------|-------|-------|-------|-------|-------|-------|-------|---|
| C. perfringens         | 170 | ..... | 170   | ..... | 180   | ..... | 190   | ..... | 200   | ..... | 210   | ..... | 220   | ..... | 230   | ..... | 240   | ..... | 250   | ..... | 260   |   |
| M. thermoautotrophicus | 188 | ..... | ..... | ..... | ..... | ..... | ..... | ..... | ..... | ..... | ..... | ..... | ..... | ..... | ..... | ..... | ..... | ..... | ..... | ..... | ..... |   |
| S. acidocaldarius      | 190 | ..... | ..... | ..... | ..... | ..... | ..... | ..... | ..... | ..... | ..... | ..... | ..... | ..... | ..... | ..... | ..... | ..... | ..... | ..... | ..... |   |
| E. coli                | 511 | L     | N     | N     | A     | N     | D     | V     | M     | T     | Q     | L     | L     | N     | I     | D     | W     | Y     | R     | G     | L     | I |
| Z. mays                | 571 | L     | Q     | S     | A     | P     | A     | S     | V     | E     | R     | L     | F     | S     | V     | D     | W     | M     | D     | R     | I     | K |
| Z. mays X-ray          |     | ..... | ..... | ..... | ..... | ..... | ..... | ..... | ..... | ..... | ..... | ..... | ..... | ..... | ..... | ..... | ..... | ..... | ..... | ..... | ..... |   |

Residues noted in text

C. perfringens X-ray

|                        |     |       |       |       |       |       |       |       |       |       |       |       |       |       |       |       |       |       |       |       |       |   |
|------------------------|-----|-------|-------|-------|-------|-------|-------|-------|-------|-------|-------|-------|-------|-------|-------|-------|-------|-------|-------|-------|-------|---|
| C. perfringens         | 265 | ..... | 265   | ..... | 270   | ..... | 280   | ..... | 290   | ..... | 300   | ..... | 310   | ..... | 320   | ..... | 330   | ..... | 340   | ..... | 350   |   |
| M. thermoautotrophicus | 278 | ..... | ..... | ..... | ..... | ..... | ..... | ..... | ..... | ..... | ..... | ..... | ..... | ..... | ..... | ..... | ..... | ..... | ..... | ..... | ..... |   |
| S. acidocaldarius      | 280 | ..... | ..... | ..... | ..... | ..... | ..... | ..... | ..... | ..... | ..... | ..... | ..... | ..... | ..... | ..... | ..... | ..... | ..... | ..... | ..... |   |
| E. coli                | 608 | L     | R     | V     | T     | E     | Q     | G     | E     | M     | I     | R     | F     | K     | Y     | G     | L     | P     | E     | I     | T     | V |
| Z. mays                | 668 | I     | R     | V     | T     | V     | Q     | G     | E     | V     | I     | E     | F     | C     | F     | G     | E     | E     | H     | L     | C     | F |
| Z. mays X-ray          |     | ..... | ..... | ..... | ..... | ..... | ..... | ..... | ..... | ..... | ..... | ..... | ..... | ..... | ..... | ..... | ..... | ..... | ..... | ..... | ..... |   |

Residues noted in text
